# Supplementary material for: How Does Selenium Intake Differ among Children (1–3 Years) on Vegetarian, Vegan, and Omnivorous Diets? Results of the VeChi Diet Study
Source: MDPI journal article supplement (doi:10.3390/nu15010034), 2022-12-21
Supplement: s1 [file s1]

**Table S1:** Adjusted mean daily selenium intake among 1- to 3-year-old children by dietary group.

|                                                                         | Basic model*       |               |                    |          | Final model      |          |                  |
|-------------------------------------------------------------------------|--------------------|---------------|--------------------|----------|------------------|----------|------------------|
|                                                                         | VN<br>n = 139      | VG<br>n = 127 | OM<br>n = 164      | <i>p</i> | Partial $\eta^2$ | <i>p</i> | Partial $\eta^2$ |
| Adjusted mean selenium intake (µg/d) <sup>a</sup>                       | 2.78 <sup>1</sup>  | 2.77          | 3.05 <sup>1</sup>  | 0.062    | 0.013            | < 0.001  | 0.058            |
| Adjusted mean selenium intake excluding Brazil nuts (µg/d) <sup>b</sup> | 17.51 <sup>1</sup> | 17.43         | 22.34 <sup>1</sup> | <0.001   | 0.044            | <0.001   | 0.047            |
| Adjusted mean selenium intake (µg/1,000 kcal/d) <sup>c</sup>            | 2.85 <sup>1</sup>  | 2.84          | 3.09 <sup>1</sup>  | 0.105    | 0.011            | <0.001   | 0.044            |

Vegan (VN); vegetarian (VG); omnivorous diet (OM). Values are given as means (x). \* *p*-values and effect sizes were determined using ANCOVA, adjusting for age and sex. <sup>a</sup> In the fully adjusted model (log [x]), we adjusted for age, sex, weight-to-height Z-scores, season, socio-economic status, and energy intake (n = 430). <sup>b</sup> In the fully adjusted model, we adjusted for age, sex, weight-to-height Z-scores, season, socio-economic status, and energy intake (n = 423). <sup>c</sup> In the fully adjusted model (log[x]), we adjusted for age, sex, weight-to-height Z-scores, season, and socio-economic status (n = 423). <sup>1</sup> Values with the same superscripts are significantly different in the fully fitted model (*p* < 0.001).
